# Supplementary material for: Identification of Urinary Polyphenol Metabolite Patterns Associated with Polyphenol-Rich Food Intake in Adults from Four European Countries
Source: MDPI journal article supplement (doi:10.3390/nu9080796), 2017-07-25
Supplement: s1 [file s1]

**Table S1. Correlation coefficients<sup>a</sup> between urinary polyphenols and intakes of whole main food groups from 24-HDR among total subjects (n=475).**

| Polyphenols (n=34)                | Food groups (Consumers %) |            |         |                     |                |         |                      |                    |         |         |                         |                     |
|-----------------------------------|---------------------------|------------|---------|---------------------|----------------|---------|----------------------|--------------------|---------|---------|-------------------------|---------------------|
|                                   | Potatoes                  | Vegetables | Legumes | Fruit, nuts & seeds | Dairy products | Cereals | Meat & Meat products | Fish and shellfish | Eggs    | Fat     | Non alcoholic beverages | Alcoholic beverages |
|                                   | (39.8%)                   | (91.8%)    | (8.0%)  | (88.2%)             | (92.4%)        | (99.8%) | (82.9%)              | (26.9%)            | (23.4%) | (95.4%) | (99.2%)                 | (57.3%)             |
| Protocatechuic acid               | -0.101                    | 0.064      | 0.075   | 0.029               | 0.028          | -0.137  | 0.012                | -0.022             | 0.022   | -0.076  | 0.127                   | 0.070               |
| Hydroxytyrosol                    | -0.075                    | 0.180      | 0.042   | 0.049               | -0.094         | -0.015  | -0.011               | 0.118              | -0.007  | -0.001  | 0.003                   | 0.394               |
| 3,5-Dihydroxybenzoic acid         | -0.086                    | 0.111      | 0.026   | 0.069               | 0.094          | 0.193   | -0.085               | -0.004             | -0.077  | 0.095   | 0.061                   | -0.120              |
| 3,4-Dihydroxyphenylacetic acid    | -0.069                    | 0.120      | 0.039   | 0.241               | -0.089         | -0.026  | -0.047               | 0.056              | -0.016  | 0.032   | 0.054                   | 0.084               |
| Genistein                         | 0.149                     | 0.025      | 0.011   | 0.060               | -0.073         | -0.046  | -0.104               | 0.025              | -0.045  | 0.044   | -0.018                  | -0.086              |
| Apigenin                          | -0.004                    | 0.097      | 0.009   | 0.059               | -0.079         | -0.010  | -0.002               | -0.044             | -0.086  | 0.018   | 0.024                   | -0.147              |
| 3,4-Dihydroxyphenylpropionic acid | -0.104                    | -0.107     | -0.070  | 0.049               | -0.007         | -0.054  | 0.011                | 0.038              | 0.002   | -0.053  | 0.107                   | 0.034               |
| 3,5-Dihydroxyphenylpropionic acid | -0.056                    | 0.090      | 0.028   | 0.049               | 0.044          | 0.140   | -0.079               | -0.021             | -0.010  | 0.063   | 0.074                   | -0.026              |
| 3-Hydroxybenzoic acid             | -0.020                    | 0.077      | -0.011  | 0.008               | 0.036          | -0.081  | -0.085               | 0.036              | 0.087   | 0.012   | 0.092                   | 0.124               |
| 4-Hydroxybenzoic acid             | 0.008                     | 0.141      | 0.082   | 0.189               | -0.042         | -0.059  | -0.011               | 0.034              | 0.041   | 0.012   | 0.047                   | 0.025               |
| Tyrosol                           | -0.032                    | 0.103      | -0.023  | -0.137              | -0.123         | -0.007  | 0.005                | 0.081              | -0.043  | -0.060  | -0.010                  | 0.586               |
| 3-Hydroxyphenylacetic acid        | -0.010                    | 0.092      | 0.027   | 0.182               | 0.049          | -0.029  | -0.091               | 0.063              | -0.046  | 0.000   | 0.026                   | 0.029               |
| 4-Hydroxyphenylacetic acid        | -0.019                    | 0.022      | -0.007  | -0.074              | -0.011         | -0.016  | 0.087                | -0.010             | 0.008   | -0.121  | -0.032                  | 0.356               |
| m-Coumaric acid                   | -0.008                    | 0.005      | -0.034  | -0.045              | -0.031         | -0.100  | -0.006               | 0.041              | -0.001  | 0.013   | 0.040                   | 0.194               |
| p-Coumaric acid                   | 0.008                     | 0.099      | 0.002   | 0.135               | -0.087         | -0.053  | -0.015               | 0.080              | -0.070  | -0.072  | 0.080                   | 0.266               |
| Vanillic acid                     | -0.046                    | -0.013     | 0.097   | -0.014              | -0.002         | -0.175  | -0.073               | -0.013             | -0.065  | -0.032  | 0.082                   | -0.038              |
| Naringenin                        | -0.092                    | 0.066      | -0.028  | 0.218               | -0.020         | 0.031   | 0.034                | -0.025             | -0.116  | -0.052  | 0.043                   | -0.007              |
| Phloretin                         | 0.013                     | 0.030      | -0.012  | 0.191               | 0.055          | -0.080  | -0.030               | -0.018             | 0.011   | -0.067  | 0.078                   | -0.025              |
| Kaempferol                        | -0.042                    | 0.082      | -0.041  | 0.161               | -0.052         | -0.038  | 0.008                | -0.028             | -0.142  | -0.023  | 0.033                   | -0.014              |
| Epicatechin                       | -0.016                    | 0.009      | -0.051  | 0.154               | -0.072         | -0.081  | -0.018               | -0.051             | -0.029  | 0.036   | 0.035                   | 0.069               |
| Catechin                          | -0.023                    | 0.060      | -0.015  | 0.097               | -0.029         | -0.042  | 0.062                | -0.007             | -0.021  | 0.010   | -0.005                  | 0.300               |
| Hesperetin                        | -0.049                    | 0.012      | -0.005  | 0.229               | -0.018         | -0.017  | 0.018                | 0.009              | -0.140  | -0.024  | 0.022                   | 0.030               |
| Homovanillic acid                 | 0.001                     | 0.118      | -0.002  | 0.166               | -0.052         | 0.005   | -0.050               | 0.066              | -0.078  | 0.005   | 0.081                   | 0.042               |
| Isorhamnetin                      | 0.004                     | 0.070      | -0.009  | 0.114               | -0.093         | -0.090  | -0.055               | 0.036              | -0.098  | 0.045   | 0.109                   | 0.000               |
| Ferulic acid                      | -0.114                    | -0.015     | 0.047   | 0.085               | -0.027         | -0.006  | 0.001                | -0.031             | -0.028  | -0.087  | 0.084                   | 0.083               |
| Resveratrol                       | 0.009                     | 0.052      | -0.026  | -0.070              | -0.016         | -0.056  | 0.081                | 0.036              | -0.046  | -0.147  | 0.001                   | 0.368               |
| Quercetin                         | 0.019                     | 0.141      | -0.015  | 0.113               | -0.112         | -0.120  | 0.008                | 0.036              | -0.095  | 0.062   | 0.098                   | 0.067               |
| Caffeic acid                      | -0.107                    | 0.007      | -0.010  | 0.012               | 0.004          | -0.072  | 0.038                | -0.008             | -0.012  | -0.058  | 0.105                   | 0.122               |
| Equol                             | 0.146                     | 0.041      | -0.030  | 0.015               | 0.000          | -0.014  | -0.107               | -0.029             | -0.016  | 0.072   | -0.039                  | 0.008               |
| Daidzein                          | 0.103                     | 0.030      | 0.066   | 0.049               | -0.055         | -0.060  | -0.134               | 0.070              | -0.002  | 0.079   | -0.022                  | -0.021              |
| Enterolactone                     | 0.021                     | 0.129      | 0.050   | 0.123               | 0.065          | 0.118   | -0.029               | -0.044             | 0.070   | -0.057  | 0.002                   | 0.102               |
| Enterodiol                        | 0.063                     | 0.048      | 0.013   | 0.092               | -0.040         | 0.037   | -0.075               | -0.036             | 0.029   | -0.046  | 0.044                   | -0.013              |
| Gallic acid                       | -0.072                    | 0.071      | 0.052   | 0.010               | 0.004          | -0.045  | 0.070                | -0.034             | 0.013   | -0.006  | 0.020                   | 0.306               |
| Gallic acid ethyl ester           | -0.023                    | 0.065      | -0.037  | -0.068              | -0.019         | -0.076  | 0.091                | 0.033              | -0.007  | -0.118  | -0.021                  | 0.437               |

<sup>a</sup> Partial Pearson correlation with sex, BMI and age covariates. Urinary polyphenols were adjusted for center and batch and intakes of food groups were adjusted for energy intake using residuals from General Linear Models (GLMs). Positive coefficients in blue were significant (P<0.05) and higher coefficients had darker color.

**Table S2. Correlation coefficients<sup>a</sup> between urinary polyphenols and intakes of vegetable groups from 24-HDR among total subjects (n=475).**

| Polyphenols (n=34)                | Food groups (Consumers %) |                  |                     |                 |          |           |                          |               |                           |                               |
|-----------------------------------|---------------------------|------------------|---------------------|-----------------|----------|-----------|--------------------------|---------------|---------------------------|-------------------------------|
|                                   | Vegetables                | Leafy vegetables | Fruiting vegetables | Root vegetables | Cabbages | Mushrooms | Grain and pod vegetables | Onion, garlic | Stalk vegetables, sprouts | Mixed salad, mixed vegetables |
|                                   | (91.8%)                   | (35.2%)          | (62.5%)             | (21.3%)         | (15.4%)  | (9.1%)    | (12.0%)                  | (46.3%)       | (14.9%)                   | (11.4%)                       |
| Protocatechuic acid               | 0.064                     | 0.066            | -0.010              | 0.027           | 0.071    | 0.029     | 0.015                    | -0.020        | -0.087                    | 0.060                         |
| Hydroxytyrosol                    | 0.180                     | 0.075            | 0.169               | 0.035           | 0.044    | 0.047     | 0.050                    | 0.016         | -0.022                    | 0.133                         |
| 3,5-Dihydroxybenzoic acid         | 0.111                     | 0.063            | 0.131               | 0.093           | -0.045   | -0.009    | -0.013                   | 0.011         | -0.051                    | 0.014                         |
| 3,4-Dihydroxyphenylacetic acid    | 0.120                     | 0.056            | 0.065               | 0.042           | 0.039    | 0.029     | 0.014                    | 0.071         | -0.057                    | 0.108                         |
| Genistein                         | 0.025                     | 0.031            | -0.034              | 0.053           | 0.008    | -0.036    | 0.061                    | -0.003        | 0.028                     | 0.005                         |
| Apigenin                          | 0.097                     | 0.099            | 0.052               | 0.093           | 0.021    | 0.023     | -0.039                   | 0.085         | 0.023                     | 0.154                         |
| 3,4-Dihydroxyphenylpropionic acid | -0.107                    | 0.009            | -0.142              | 0.032           | -0.008   | 0.001     | -0.046                   | -0.063        | -0.020                    | 0.012                         |
| 3,5-Dihydroxyphenylpropionic acid | 0.090                     | 0.058            | 0.022               | 0.029           | 0.076    | -0.033    | -0.003                   | 0.012         | -0.015                    | 0.015                         |
| 3-Hydroxybenzoic acid             | 0.077                     | 0.013            | 0.005               | 0.000           | 0.116    | -0.040    | 0.025                    | -0.038        | -0.011                    | 0.019                         |
| 4-Hydroxybenzoic acid             | 0.141                     | -0.019           | 0.145               | 0.053           | 0.035    | -0.011    | 0.002                    | 0.053         | -0.018                    | 0.083                         |
| Tyrosol                           | 0.103                     | 0.066            | 0.071               | 0.049           | -0.003   | 0.058     | 0.087                    | -0.063        | 0.021                     | 0.143                         |
| 3-Hydroxyphenylacetic acid        | 0.092                     | 0.062            | 0.078               | 0.046           | -0.015   | -0.024    | 0.125                    | 0.071         | -0.008                    | -0.010                        |
| 4-Hydroxyphenylacetic acid        | 0.022                     | 0.019            | -0.003              | -0.058          | -0.027   | 0.064     | 0.060                    | -0.050        | -0.002                    | 0.118                         |
| m-Coumaric acid                   | 0.005                     | -0.004           | -0.063              | -0.009          | 0.073    | -0.015    | -0.001                   | -0.053        | 0.038                     | 0.040                         |
| p-Coumaric acid                   | 0.099                     | 0.047            | 0.089               | 0.047           | -0.012   | -0.057    | 0.043                    | 0.000         | 0.009                     | 0.081                         |
| Vanillic acid                     | -0.013                    | 0.050            | 0.003               | 0.032           | 0.022    | -0.061    | -0.046                   | -0.003        | -0.069                    | -0.058                        |
| Naringenin                        | 0.066                     | 0.058            | 0.029               | -0.045          | 0.034    | 0.105     | -0.090                   | 0.079         | 0.052                     | 0.002                         |
| Phloretin                         | 0.030                     | 0.022            | -0.004              | -0.042          | 0.074    | -0.079    | -0.012                   | 0.057         | -0.045                    | -0.018                        |
| Kaempferol                        | 0.082                     | 0.042            | -0.023              | -0.012          | 0.097    | 0.036     | -0.003                   | 0.071         | 0.080                     | 0.005                         |
| Epicatechin                       | 0.009                     | 0.042            | -0.053              | 0.012           | 0.033    | -0.086    | 0.072                    | -0.028        | -0.041                    | 0.009                         |
| Catechin                          | 0.060                     | 0.006            | 0.029               | -0.028          | 0.064    | -0.037    | 0.082                    | -0.006        | 0.048                     | 0.028                         |
| Hesperetin                        | 0.012                     | 0.030            | -0.058              | 0.004           | 0.054    | 0.132     | -0.040                   | 0.055         | 0.011                     | -0.007                        |
| Homovanillic acid                 | 0.118                     | 0.055            | 0.052               | 0.074           | -0.002   | -0.019    | 0.060                    | 0.065         | -0.037                    | 0.077                         |
| Isorhamnetin                      | 0.070                     | 0.029            | 0.037               | 0.047           | 0.065    | 0.011     | 0.052                    | 0.097         | -0.035                    | 0.092                         |
| Ferulic acid                      | -0.015                    | 0.035            | -0.041              | 0.023           | -0.020   | 0.027     | -0.053                   | -0.040        | -0.039                    | 0.022                         |
| Resveratrol                       | 0.052                     | 0.000            | -0.057              | -0.001          | 0.066    | 0.028     | 0.095                    | -0.074        | 0.024                     | 0.144                         |
| Quercetin                         | 0.141                     | 0.079            | 0.029               | 0.023           | 0.106    | -0.020    | 0.020                    | 0.215         | 0.007                     | 0.123                         |
| Caffeic acid                      | 0.007                     | 0.052            | -0.035              | 0.021           | 0.046    | 0.015     | -0.014                   | -0.030        | -0.041                    | 0.064                         |
| Equol                             | 0.041                     | 0.020            | 0.066               | 0.096           | 0.024    | 0.002     | 0.059                    | 0.037         | 0.056                     | 0.026                         |
| Daidzein                          | 0.030                     | 0.011            | 0.030               | 0.043           | -0.008   | -0.044    | 0.074                    | 0.041         | -0.022                    | 0.024                         |
| Enterolactone                     | 0.129                     | 0.008            | 0.102               | 0.024           | 0.105    | 0.008     | 0.025                    | 0.001         | 0.028                     | 0.027                         |
| Enterodiol                        | 0.048                     | 0.011            | -0.002              | 0.008           | 0.125    | 0.011     | -0.026                   | 0.047         | 0.107                     | -0.001                        |
| Gallic acid                       | 0.071                     | 0.064            | -0.062              | 0.037           | 0.084    | -0.026    | 0.070                    | 0.004         | -0.028                    | 0.093                         |
| Gallic acid ethyl ester           | 0.065                     | 0.034            | -0.037              | -0.027          | 0.118    | 0.014     | 0.118                    | 0.008         | -0.030                    | 0.088                         |

<sup>a</sup> Partial Pearson correlation with sex, BMI and age covariates. Urinary polyphenols were adjusted for center and batch and intakes of food groups were adjusted for energy intake using residuals from General Linear Models (GLMs). Positive coefficients in blue were significant (P<0.05) and higher coefficients had darker color.

**Table S3. Correlation coefficients<sup>a</sup> between urinary polyphenols and intakes of fruit groups from 24-HDR among total subjects (n=475).**

| Polyphenols (n=34)                | Food groups (Consumers %) |                          |                            |                 |                         |                        |                   |                   |                |                         |                        |                  |
|-----------------------------------|---------------------------|--------------------------|----------------------------|-----------------|-------------------------|------------------------|-------------------|-------------------|----------------|-------------------------|------------------------|------------------|
|                                   | Fruit<br>(83.8%)          | Citrus fruits<br>(38.9%) | Apple and pears<br>(47.6%) | Grape<br>(3.6%) | Stone fruits<br>(16.6%) | Other fruits<br>(9.5%) | Berries<br>(8.8%) | Banana<br>(13.7%) | Kiwi<br>(7.6%) | Nuts & seeds<br>(10.7%) | Mixed fruits<br>(3.8%) | Olives<br>(9.3%) |
| Protocatechuic acid               | 0.032                     | 0.020                    | 0.018                      | -0.012          | 0.070                   | 0.030                  | 0.051             | -0.065            | 0.048          | 0.027                   | -0.020                 | 0.055            |
| Hydroxytyrosol                    | 0.017                     | 0.020                    | 0.010                      | 0.045           | 0.088                   | 0.004                  | 0.123             | -0.064            | 0.047          | 0.066                   | 0.021                  | 0.360            |
| 3,5-Dihydroxybenzoic acid         | 0.064                     | 0.080                    | 0.023                      | -0.005          | 0.019                   | -0.006                 | -0.040            | -0.050            | -0.026         | 0.027                   | -0.027                 | 0.034            |
| 3,4-Dihydroxyphenylacetic acid    | 0.197                     | 0.174                    | 0.134                      | 0.027           | 0.100                   | 0.025                  | 0.072             | -0.010            | 0.076          | 0.096                   | 0.008                  | 0.312            |
| Genistein                         | 0.056                     | 0.076                    | 0.018                      | -0.012          | 0.072                   | -0.088                 | 0.004             | -0.018            | 0.017          | 0.051                   | -0.063                 | -0.027           |
| Apigenin                          | 0.040                     | 0.088                    | 0.055                      | -0.006          | 0.037                   | -0.007                 | 0.006             | 0.006             | 0.030          | 0.022                   | -0.073                 | 0.014            |
| 3,4-Dihydroxyphenylpropionic acid | 0.073                     | 0.062                    | 0.086                      | 0.008           | 0.024                   | 0.069                  | 0.023             | -0.067            | 0.047          | -0.011                  | -0.075                 | 0.012            |
| 3,5-Dihydroxyphenylpropionic acid | 0.037                     | 0.077                    | 0.022                      | -0.053          | 0.031                   | -0.011                 | -0.037            | -0.065            | -0.061         | 0.030                   | -0.032                 | 0.020            |
| 3-Hydroxybenzoic acid             | 0.023                     | 0.029                    | 0.024                      | 0.029           | 0.066                   | -0.070                 | 0.019             | -0.072            | 0.049          | -0.068                  | 0.003                  | -0.013           |
| 4-Hydroxybenzoic acid             | 0.168                     | 0.191                    | -0.031                     | -0.021          | 0.135                   | 0.094                  | 0.058             | -0.009            | 0.041          | 0.007                   | -0.026                 | 0.071            |
| Tyrosol                           | -0.126                    | -0.079                   | -0.084                     | -0.049          | 0.081                   | -0.043                 | 0.013             | -0.148            | -0.010         | 0.033                   | 0.004                  | 0.117            |
| 3-Hydroxyphenylacetic acid        | 0.166                     | 0.121                    | 0.141                      | 0.027           | 0.051                   | -0.031                 | -0.003            | -0.034            | 0.094          | -0.096                  | 0.006                  | 0.058            |
| 4-Hydroxyphenylacetic acid        | -0.079                    | -0.014                   | -0.060                     | -0.039          | 0.046                   | 0.006                  | 0.038             | -0.057            | -0.044         | -0.005                  | -0.003                 | 0.054            |
| m-Coumaric acid                   | -0.027                    | 0.054                    | -0.022                     | -0.059          | 0.040                   | -0.017                 | 0.020             | -0.067            | 0.025          | -0.014                  | -0.032                 | 0.001            |
| p-Coumaric acid                   | 0.124                     | 0.011                    | 0.088                      | -0.076          | 0.149                   | 0.003                  | 0.212             | -0.121            | -0.002         | 0.072                   | -0.006                 | 0.126            |
| Vanillic acid                     | -0.026                    | -0.014                   | 0.000                      | -0.017          | 0.022                   | 0.045                  | -0.017            | -0.091            | 0.012          | 0.019                   | -0.001                 | 0.009            |
| Naringenin                        | 0.200                     | 0.498                    | 0.070                      | 0.019           | -0.050                  | -0.008                 | 0.062             | 0.034             | 0.018          | -0.027                  | -0.011                 | 0.064            |
| Phloretin                         | 0.194                     | 0.151                    | 0.303                      | -0.036          | -0.046                  | 0.017                  | -0.060            | -0.033            | 0.065          | -0.050                  | -0.002                 | -0.009           |
| Kaempferol                        | 0.158                     | 0.279                    | 0.085                      | -0.034          | 0.004                   | -0.021                 | 0.068             | 0.014             | 0.021          | 0.036                   | -0.028                 | 0.036            |
| Epicatechin                       | 0.156                     | 0.020                    | 0.233                      | -0.065          | 0.102                   | -0.062                 | -0.006            | -0.085            | 0.049          | -0.010                  | -0.034                 | -0.015           |
| Catechin                          | 0.107                     | -0.069                   | 0.003                      | -0.060          | 0.246                   | -0.038                 | 0.303             | -0.095            | 0.063          | 0.001                   | -0.025                 | 0.018            |
| Hesperetin                        | 0.198                     | 0.535                    | 0.056                      | 0.023           | -0.095                  | -0.015                 | -0.053            | 0.020             | 0.016          | -0.023                  | 0.000                  | 0.023            |
| Homovanillic acid                 | 0.122                     | 0.126                    | 0.117                      | 0.049           | 0.099                   | 0.026                  | 0.006             | -0.031            | 0.016          | 0.044                   | 0.029                  | 0.241            |
| Isorhamnetin                      | 0.125                     | 0.032                    | 0.070                      | -0.012          | 0.189                   | -0.050                 | 0.059             | -0.059            | 0.034          | -0.001                  | -0.066                 | 0.036            |
| Ferulic acid                      | 0.102                     | 0.170                    | 0.053                      | -0.045          | 0.029                   | 0.048                  | 0.028             | -0.055            | -0.039         | -0.012                  | -0.057                 | 0.028            |
| Resveratrol                       | -0.058                    | 0.028                    | -0.049                     | 0.035           | 0.020                   | -0.010                 | 0.043             | -0.116            | 0.009          | 0.045                   | -0.003                 | 0.007            |
| Quercetin                         | 0.116                     | 0.190                    | 0.083                      | -0.039          | 0.006                   | -0.050                 | 0.011             | -0.013            | -0.004         | -0.046                  | -0.055                 | -0.008           |
| Caffeic acid                      | 0.030                     | 0.068                    | 0.092                      | -0.011          | -0.007                  | 0.014                  | 0.022             | -0.086            | 0.043          | -0.010                  | -0.048                 | 0.049            |
| Equol                             | 0.006                     | -0.060                   | -0.068                     | -0.002          | 0.081                   | -0.027                 | -0.013            | 0.006             | 0.032          | 0.064                   | -0.021                 | -0.040           |
| Daidzein                          | 0.036                     | 0.043                    | -0.037                     | -0.023          | 0.047                   | -0.076                 | 0.043             | 0.018             | 0.027          | 0.003                   | -0.044                 | -0.008           |
| Enterolactone                     | 0.093                     | 0.050                    | 0.045                      | 0.045           | 0.027                   | 0.014                  | -0.010            | 0.009             | 0.044          | 0.009                   | 0.035                  | 0.105            |
| Enterodiol                        | 0.059                     | 0.067                    | 0.000                      | 0.036           | 0.013                   | 0.034                  | -0.017            | 0.036             | 0.054          | 0.021                   | 0.005                  | 0.053            |
| Galllic acid                      | 0.032                     | 0.055                    | 0.064                      | -0.037          | -0.003                  | -0.033                 | -0.036            | -0.037            | 0.012          | -0.005                  | -0.084                 | 0.039            |
| Galllic acid ethyl ester          | -0.057                    | -0.016                   | -0.030                     | -0.045          | 0.012                   | -0.021                 | 0.020             | -0.102            | 0.028          | 0.007                   | -0.012                 | 0.032            |

<sup>a</sup> Partial Pearson correlation with sex, BMI and age as covariates. Urinary polyphenols were adjusted for center and batch and intakes of food groups were adjusted for energy intake using residuals from General Linear Models (GLMs). Positive coefficients in blue were significant (P<0.05) and higher coefficients had darker color.

**Table S4. Correlation coefficients<sup>a</sup> between urinary polyphenols and intakes of non-alcoholic beverage groups from 24-HDR among total subjects (n=475).**

| Polyphenols (n=34)                | Food groups (Consumers %)       |                             |                                                 |               |                     |                                                        |                             |         |         |            |
|-----------------------------------|---------------------------------|-----------------------------|-------------------------------------------------|---------------|---------------------|--------------------------------------------------------|-----------------------------|---------|---------|------------|
|                                   | Non alcoholic<br>beverages n.s. | Fruit &<br>vegetable juices | Juice n.s., non<br>citrus juice,<br>mixed juice | Citrus juices | Vegetable<br>juices | Carbonated/soft/iso<br>tonic drinks,<br>diluted syrups | Coffee, tea,<br>herbal teas | Coffee  | Tea     | Herbal tea |
|                                   | (4.4%)                          | (36.2%)                     | (11.2%)                                         | (27.6%)       | (0.4%)              | (8.6%)                                                 | (96.2%)                     | (86.3%) | (24.6%) | (20.0%)    |
| Protocatechuic acid               | 0.009                           | 0.043                       | 0.051                                           | 0.004         | 0.140               | -0.101                                                 | 0.153                       | 0.373   | -0.116  | 0.041      |
| Hydroxytyrosol                    | 0.026                           | 0.036                       | -0.021                                          | 0.078         | 0.002               | -0.136                                                 | 0.034                       | 0.010   | 0.100   | 0.028      |
| 3,5-Dihydroxybenzoic acid         | -0.101                          | 0.071                       | 0.079                                           | 0.039         | 0.043               | -0.106                                                 | 0.004                       | -0.093  | 0.130   | 0.139      |
| 3,4-Dihydroxyphenylacetic acid    | 0.052                           | 0.013                       | 0.001                                           | 0.014         | -0.012              | -0.066                                                 | 0.058                       | 0.028   | 0.053   | 0.063      |
| Genistein                         | -0.020                          | 0.007                       | -0.017                                          | 0.042         | 0.044               | 0.045                                                  | -0.040                      | -0.093  | 0.067   | 0.086      |
| Apigenin                          | -0.001                          | 0.038                       | -0.038                                          | 0.074         | 0.036               | -0.069                                                 | 0.010                       | -0.062  | -0.027  | 0.205      |
| 3,4-Dihydroxyphenylpropionic acid | -0.027                          | -0.045                      | -0.024                                          | -0.040        | 0.081               | -0.053                                                 | 0.175                       | 0.403   | -0.159  | -0.019     |
| 3,5-Dihydroxyphenylpropionic acid | -0.059                          | 0.060                       | 0.026                                           | 0.066         | 0.051               | -0.069                                                 | 0.049                       | -0.043  | 0.142   | 0.101      |
| 3-Hydroxybenzoic acid             | -0.050                          | -0.028                      | -0.005                                          | -0.032        | 0.146               | -0.098                                                 | 0.116                       | 0.162   | 0.077   | 0.023      |
| 4-Hydroxybenzoic acid             | -0.012                          | 0.034                       | 0.024                                           | 0.030         | 0.026               | -0.020                                                 | 0.048                       | 0.094   | 0.008   | 0.010      |
| Tyrosol                           | 0.019                           | 0.038                       | -0.053                                          | 0.104         | 0.016               | -0.132                                                 | -0.016                      | 0.045   | 0.037   | -0.114     |
| 3-Hydroxyphenylacetic acid        | -0.003                          | 0.028                       | 0.025                                           | 0.023         | 0.053               | -0.009                                                 | 0.035                       | 0.027   | 0.034   | 0.080      |
| 4-Hydroxyphenylacetic acid        | 0.033                           | 0.065                       | -0.030                                          | 0.134         | 0.025               | -0.092                                                 | -0.094                      | 0.012   | -0.011  | -0.113     |
| m-Coumaric acid                   | -0.085                          | -0.025                      | -0.060                                          | 0.019         | 0.167               | -0.047                                                 | 0.102                       | 0.294   | -0.092  | -0.056     |
| p-Coumaric acid                   | 0.046                           | 0.083                       | 0.078                                           | 0.037         | 0.066               | -0.084                                                 | 0.101                       | 0.104   | 0.061   | -0.009     |
| Vanillic acid                     | 0.050                           | 0.021                       | -0.039                                          | 0.079         | -0.005              | -0.081                                                 | 0.053                       | 0.107   | -0.065  | 0.095      |
| Naringenin                        | -0.016                          | 0.225                       | 0.077                                           | 0.224         | 0.015               | -0.064                                                 | 0.033                       | 0.036   | -0.018  | 0.003      |
| Phloretin                         | -0.012                          | 0.064                       | 0.164                                           | -0.069        | -0.044              | -0.108                                                 | -0.002                      | 0.000   | -0.005  | 0.032      |
| Kaempferol                        | 0.008                           | 0.173                       | 0.088                                           | 0.140         | 0.028               | -0.094                                                 | 0.027                       | 0.003   | 0.083   | 0.005      |
| Epicatechin                       | 0.010                           | -0.035                      | -0.017                                          | -0.035        | -0.068              | -0.084                                                 | -0.007                      | -0.126  | 0.193   | 0.011      |
| Catechin                          | -0.003                          | -0.033                      | -0.056                                          | 0.009         | -0.042              | -0.107                                                 | -0.044                      | -0.098  | 0.110   | -0.052     |
| Hesperetin                        | -0.052                          | 0.185                       | 0.034                                           | 0.203         | 0.012               | -0.026                                                 | 0.008                       | 0.037   | -0.061  | 0.015      |
| Homovanillic acid                 | 0.049                           | 0.016                       | -0.001                                          | 0.026         | -0.017              | -0.145                                                 | 0.023                       | -0.081  | 0.059   | 0.108      |
| Isorhamnetin                      | 0.034                           | -0.077                      | -0.065                                          | -0.033        | -0.004              | -0.128                                                 | 0.068                       | -0.055  | 0.074   | 0.162      |
| Ferulic acid                      | -0.023                          | 0.052                       | -0.029                                          | 0.101         | 0.082               | -0.106                                                 | 0.179                       | 0.422   | -0.113  | -0.082     |
| Resveratrol                       | 0.013                           | -0.001                      | 0.025                                           | -0.015        | -0.003              | -0.096                                                 | -0.010                      | 0.012   | -0.007  | -0.035     |
| Quercetin                         | 0.122                           | 0.001                       | -0.015                                          | 0.017         | -0.013              | -0.101                                                 | 0.049                       | -0.118  | 0.133   | 0.130      |
| Caffeic acid                      | -0.082                          | 0.011                       | 0.012                                           | 0.003         | 0.064               | -0.080                                                 | 0.186                       | 0.487   | -0.121  | -0.058     |
| Equol                             | -0.030                          | -0.046                      | -0.023                                          | -0.040        | -0.013              | -0.036                                                 | -0.004                      | -0.099  | 0.049   | 0.083      |
| Daidzein                          | -0.040                          | 0.011                       | -0.042                                          | 0.074         | 0.086               | 0.042                                                  | -0.044                      | -0.115  | 0.089   | 0.082      |
| Enterolactone                     | -0.046                          | 0.102                       | 0.088                                           | 0.056         | 0.019               | 0.003                                                  | 0.034                       | 0.019   | 0.042   | 0.075      |
| Enterodiol                        | -0.009                          | 0.035                       | 0.069                                           | 0.003         | 0.016               | -0.006                                                 | 0.025                       | -0.015  | 0.016   | 0.086      |
| Gallie acid                       | 0.006                           | -0.042                      | -0.051                                          | -0.010        | -0.019              | -0.152                                                 | 0.029                       | -0.125  | 0.316   | -0.049     |
| Gallie acid ethyl ester           | 0.033                           | -0.042                      | -0.016                                          | -0.015        | -0.012              | -0.111                                                 | -0.025                      | -0.009  | 0.058   | -0.033     |

<sup>a</sup> Partial Pearson correlation with sex, BMI and age as covariates. Urinary polyphenols were adjusted for center and batch and intakes of food groups were adjusted for energy intake using residuals from General Linear Models (GLMs). Positive coefficients in blue were significant (P<0.05) and higher coefficients had darker color.

**Table S5. Correlation coefficients<sup>a</sup> between urinary polyphenols and intakes of alcoholic beverage groups from 24-HDR among total subjects (n=475).**

| Polyphenols (n=34)                | Food groups (Consumers %) |          |          |            |           |             |         |        |                 |                             |          |                    |
|-----------------------------------|---------------------------|----------|----------|------------|-----------|-------------|---------|--------|-----------------|-----------------------------|----------|--------------------|
|                                   | Alcoholic beverages       | All wine | Red wine | White wine | Rose wine | Beer, cider | Beer    | Cider  | Spirits, brandy | Aniseed drinks (pastis ...) | Liqueurs | Cocktails, punches |
|                                   | (57.3%)                   | (41.9%)  | (25.5%)  | (16.6%)    | (2.9%)    | (14.1%)     | (13.1%) | (0.6%) | (5.3%)          | (1.1%)                      | (3.8%)   | (2.3%)             |
| Protocatechuic acid               | 0.070                     | 0.119    | 0.109    | 0.051      | 0.014     | -0.066      | -0.068  | 0.040  | 0.037           | -0.016                      | 0.030    | 0.020              |
| Hydroxytyrosol                    | 0.394                     | 0.430    | 0.336    | 0.259      | 0.068     | -0.032      | -0.023  | -0.031 | 0.094           | 0.086                       | 0.094    | 0.152              |
| 3,5-Dihydroxybenzoic acid         | -0.120                    | -0.016   | -0.027   | 0.015      | 0.000     | -0.142      | -0.146  | 0.045  | -0.053          | -0.016                      | -0.021   | -0.052             |
| 3,4-Dihydroxyphenylacetic acid    | 0.084                     | 0.134    | 0.116    | 0.069      | 0.044     | -0.053      | -0.045  | -0.052 | -0.049          | 0.008                       | 0.126    | -0.032             |
| Genistein                         | -0.086                    | -0.072   | -0.047   | -0.025     | -0.052    | -0.028      | -0.019  | -0.033 | -0.013          | -0.002                      | 0.025    | -0.130             |
| Apigenin                          | -0.147                    | -0.081   | -0.064   | -0.059     | -0.009    | -0.055      | -0.060  | 0.017  | -0.074          | -0.027                      | -0.076   | -0.062             |
| 3,4-Dihydroxyphenylpropionic acid | 0.034                     | 0.038    | 0.025    | 0.020      | 0.003     | 0.005       | 0.008   | 0.019  | 0.049           | -0.046                      | 0.003    | -0.034             |
| 3,5-Dihydroxyphenylpropionic acid | -0.026                    | 0.050    | 0.055    | 0.015      | 0.002     | -0.115      | -0.112  | 0.002  | -0.057          | 0.010                       | 0.007    | -0.029             |
| 3-Hydroxybenzoic acid             | 0.124                     | 0.052    | 0.091    | 0.016      | -0.039    | 0.083       | 0.086   | 0.006  | 0.038           | -0.061                      | 0.009    | -0.013             |
| 4-Hydroxybenzoic acid             | 0.025                     | 0.009    | 0.010    | 0.025      | -0.038    | 0.048       | 0.022   | 0.060  | 0.090           | 0.114                       | -0.029   | -0.035             |
| Tyrosol                           | 0.586                     | 0.429    | 0.317    | 0.232      | 0.148     | 0.220       | 0.209   | 0.079  | 0.169           | 0.104                       | 0.057    | 0.199              |
| 3-Hydroxyphenylacetic acid        | 0.029                     | 0.060    | 0.063    | 0.028      | -0.001    | -0.015      | -0.031  | 0.048  | 0.046           | 0.040                       | 0.022    | -0.100             |
| 4-Hydroxyphenylacetic acid        | 0.356                     | 0.220    | 0.164    | 0.136      | 0.014     | 0.189       | 0.195   | 0.028  | 0.045           | 0.041                       | 0.098    | 0.088              |
| m-Coumaric acid                   | 0.194                     | 0.113    | 0.128    | 0.008      | 0.008     | 0.072       | 0.088   | -0.016 | 0.064           | -0.035                      | 0.043    | 0.075              |
| p-Coumaric acid                   | 0.266                     | 0.270    | 0.212    | 0.163      | 0.019     | -0.010      | -0.026  | 0.049  | 0.173           | 0.294                       | -0.001   | 0.082              |
| Vanillic acid                     | -0.038                    | -0.017   | 0.024    | -0.039     | -0.023    | -0.037      | -0.032  | -0.015 | -0.038          | -0.062                      | 0.015    | 0.009              |
| Naringenin                        | -0.007                    | 0.025    | -0.043   | 0.077      | -0.005    | -0.026      | -0.031  | -0.009 | 0.024           | 0.054                       | -0.065   | 0.032              |
| Phloretin                         | -0.025                    | -0.027   | -0.057   | -0.018     | 0.005     | 0.015       | 0.004   | 0.088  | -0.020          | -0.013                      | -0.050   | 0.005              |
| Kaempferol                        | -0.014                    | -0.002   | -0.021   | 0.002      | -0.001    | -0.021      | -0.020  | -0.015 | 0.004           | 0.016                       | -0.036   | 0.039              |
| Epicatechin                       | 0.069                     | 0.135    | 0.123    | -0.010     | 0.107     | -0.043      | -0.041  | -0.038 | -0.042          | -0.081                      | 0.056    | -0.056             |
| Catechin                          | 0.300                     | 0.280    | 0.280    | 0.073      | 0.067     | 0.086       | 0.072   | -0.049 | 0.009           | -0.009                      | 0.141    | 0.024              |
| Hesperetin                        | 0.030                     | 0.004    | -0.003   | 0.013      | 0.013     | 0.044       | 0.047   | 0.028  | 0.015           | 0.026                       | -0.074   | 0.037              |
| Homovanillic acid                 | 0.042                     | 0.065    | 0.069    | 0.010      | 0.036     | -0.028      | -0.012  | -0.061 | -0.045          | 0.010                       | 0.092    | -0.044             |
| Isorhamnetin                      | 0.000                     | 0.047    | 0.078    | -0.057     | 0.021     | -0.029      | -0.037  | 0.048  | -0.039          | -0.052                      | 0.029    | -0.035             |
| Ferulic acid                      | 0.083                     | 0.036    | 0.003    | 0.056      | 0.003     | 0.048       | 0.051   | -0.002 | 0.049           | -0.020                      | -0.035   | 0.044              |
| Resveratrol                       | 0.368                     | 0.409    | 0.457    | 0.029      | 0.128     | -0.060      | -0.055  | -0.013 | 0.032           | 0.023                       | 0.062    | 0.098              |
| Quercetin                         | 0.067                     | 0.126    | 0.141    | 0.012      | 0.046     | -0.044      | -0.038  | -0.020 | -0.010          | -0.010                      | 0.009    | -0.009             |
| Caffeic acid                      | 0.122                     | 0.119    | 0.084    | 0.074      | 0.023     | 0.016       | 0.000   | 0.051  | 0.107           | -0.028                      | 0.010    | 0.003              |
| Equol                             | 0.008                     | 0.009    | 0.060    | -0.079     | -0.038    | 0.004       | 0.005   | -0.004 | -0.039          | -0.022                      | -0.009   | -0.095             |
| Daidzein                          | -0.021                    | -0.023   | -0.029   | -0.011     | -0.011    | 0.009       | -0.001  | 0.021  | -0.016          | 0.008                       | 0.052    | -0.129             |
| Enterolactone                     | 0.102                     | 0.077    | 0.032    | 0.097      | -0.025    | 0.040       | 0.043   | 0.018  | 0.063           | 0.026                       | 0.028    | -0.029             |
| Enterodiol                        | -0.013                    | 0.018    | 0.027    | 0.011      | -0.041    | 0.001       | 0.009   | -0.035 | -0.066          | -0.055                      | 0.026    | -0.090             |
| Gallic acid                       | 0.306                     | 0.344    | 0.380    | 0.046      | 0.085     | -0.028      | -0.017  | -0.032 | 0.024           | -0.024                      | 0.066    | 0.025              |
| Gallic acid ethyl ester           | 0.437                     | 0.508    | 0.654    | 0.001      | 0.039     | -0.073      | -0.067  | -0.019 | 0.011           | 0.020                       | 0.121    | 0.095              |

<sup>a</sup> Partial Pearson correlation with sex, BMI and age. Urinary polyphenols were adjusted for center and batch and intakes of food groups were adjusted for energy intake using residual from General Linear Model (GLM). Positive coefficients in blue were significant (P<0.05) and higher coefficients had darker color.

**Table S6. Correlations coefficients and area under the receiver operating characteristic curves (ROC AUCs) of RRR scores of selected polyphenol (PP) metabolites with polyphenol-rich foods from 24-HDR and DQ in total subjects (n=475)**

| Food groups <sup>a</sup> | Selected PPs <sup>b</sup>           | 24-HDR        |                |                      |              |              | DQ            |                |                      |              |              |
|--------------------------|-------------------------------------|---------------|----------------|----------------------|--------------|--------------|---------------|----------------|----------------------|--------------|--------------|
|                          |                                     | Consumers (%) | r <sup>c</sup> | ROC AUC <sup>d</sup> | Lower 95% CI | Upper 95% CI | Consumers (%) | r <sup>c</sup> | ROC AUC <sup>d</sup> | Lower 95% CI | Upper 95% CI |
| Citrus fruit             | Single PP (Hesperetin)              | 39%           | 0.535          | 81.3%                | 77.3%        | 85.3%        | 97%           | 0.119          | 76.0%                | 64.9%        | 87.2%        |
|                          | PPs by RRR-VIP (n=11)               |               | 0.570          | 83.9%                | 80.2%        | 87.7%        |               | 0.108          | 75.6%                | 65.1%        | 86.2%        |
|                          | PPs by Lasso (n=11)                 |               | 0.599          | 83.7%                | 79.8%        | 87.5%        |               | 0.143          | 75.8%                | 65.0%        | 86.7%        |
| Apple & Pear             | Single PP (Phloretin)               | 48%           | 0.303          | 72.0%                | 67.4%        | 76.5%        | 97%           | 0.119          | 67.4%                | 54.8%        | 80.0%        |
|                          | PPs by RRR-VIP (n=10)               |               | 0.381          | 74.2%                | 69.8%        | 69.8%        |               | 0.167          | 68.1%                | 55.8%        | 80.5%        |
|                          | PPs by Lasso (n=2)                  |               | 0.331          | 72.4%                | 72.4%        | 76.9%        |               | 0.148          | 67.6%                | 55.0%        | 80.3%        |
| Olives                   | Single PP (Hydroxytyrosol)          | 9%            | 0.360          | 81.4%                | 74.8%        | 88.0%        | 22%           | 0.099          | 61.1%                | 55.1%        | 67.2%        |
|                          | PPs by RRR-VIP (n=5)                |               | 0.439          | 86.6%                | 81.6%        | 91.7%        |               | 0.085          | 60.7%                | 54.6%        | 66.9%        |
|                          | PPs by Lasso (n=10)                 |               | 0.447          | 86.5%                | 81.2%        | 91.8%        |               | 0.088          | 60.8%                | 54.6%        | 66.9%        |
| Coffee                   | Single PP (Caffeic acid)            | 86%           | 0.487          | 86.0%                | 80.7%        | 91.2%        | 94%           | 0.412          | 75.1%                | 65.6%        | 84.5%        |
|                          | PPs by RRR-VIP (n=11)               |               | 0.591          | 90.6%                | 86.5%        | 94.7%        |               | 0.479          | 80.9%                | 72.7%        | 89.1%        |
|                          | PPs by Lasso (n=15)                 |               | 0.602          | 91.4%                | 87.7%        | 95.1%        |               | 0.480          | 79.4%                | 70.9%        | 87.8%        |
| Tea                      | Single PP (Gallic acid)             | 25%           | 0.316          | 69.5%                | 63.8%        | 75.2%        | 66%           | 0.156          | 58.4%                | 52.9%        | 63.8%        |
|                          | PPs by RRR-VIP (n=9)                |               | 0.446          | 75.8%                | 70.4%        | 81.1%        |               | 0.263          | 60.8%                | 55.6%        | 65.9%        |
|                          | PPs by Lasso (n=26)                 |               | 0.496          | 79.2%                | 74.3%        | 84.1%        |               | 0.267          | 60.4%                | 55.1%        | 65.7%        |
| Wine                     | Single PP (Gallic acid ethyl ester) | 42%           | 0.508          | 76.6%                | 72.0%        | 81.2%        | 85%           | 0.407          | 74.1%                | 68.0%        | 80.2%        |
|                          | PPs by RRR-VIP (n=7)                |               | 0.567          | 80.1%                | 75.9%        | 84.2%        |               | 0.448          | 75.5%                | 69.8%        | 81.2%        |
|                          | PPs by Lasso (n=11)                 |               | 0.579          | 80.6%                | 76.6%        | 84.6%        |               | 0.467          | 77.2%                | 71.5%        | 82.9%        |
| Red Wine                 | Single PP (Gallic acid ethyl ester) | 25%           | 0.654          | 88.6%                | 84.8%        | 92.4%        | 27%           | 0.231          | 64.6%                | 58.8%        | 70.5%        |
|                          | PPs by RRR-VIP (n=2)                |               | 0.661          | 88.3%                | 84.6%        | 92.0%        |               | 0.225          | 64.6%                | 58.8%        | 70.4%        |
|                          | PPs by Lasso (n=1)                  |               | 0.654          | 88.6%                | 84.8%        | 92.4%        |               | 0.231          | 64.6%                | 58.8%        | 70.5%        |

<sup>a</sup> Intakes of food groups were adjusted for energy intake using residuals from General linear models (GLMs).

<sup>b</sup> Polyphenol metabolites were adjusted for centers and batches using residuals from GLMs.

<sup>c</sup> Partial Pearson correlation coefficients between RRR scores of selected polyphenols and food groups with sex, BMI and age covariates.

<sup>d</sup> ROC AUCs for RRR scores of the patterns of selected polyphenols were calculated and adjusted for sex, BMI and age using logistic regression models.
